# Supplementary material for: Repression of TERRA Expression by Subtelomeric DNA Methylation Is Dependent on NRF1 Binding
Source: PubMed Central journal article supplement (PMC6600276; doi:10.3390/ijms20112791), 2019-06-07
Supplement: ijms-20-02791-s001.pdf [file ijms-20-02791-s001.pdf]

# Figure S1

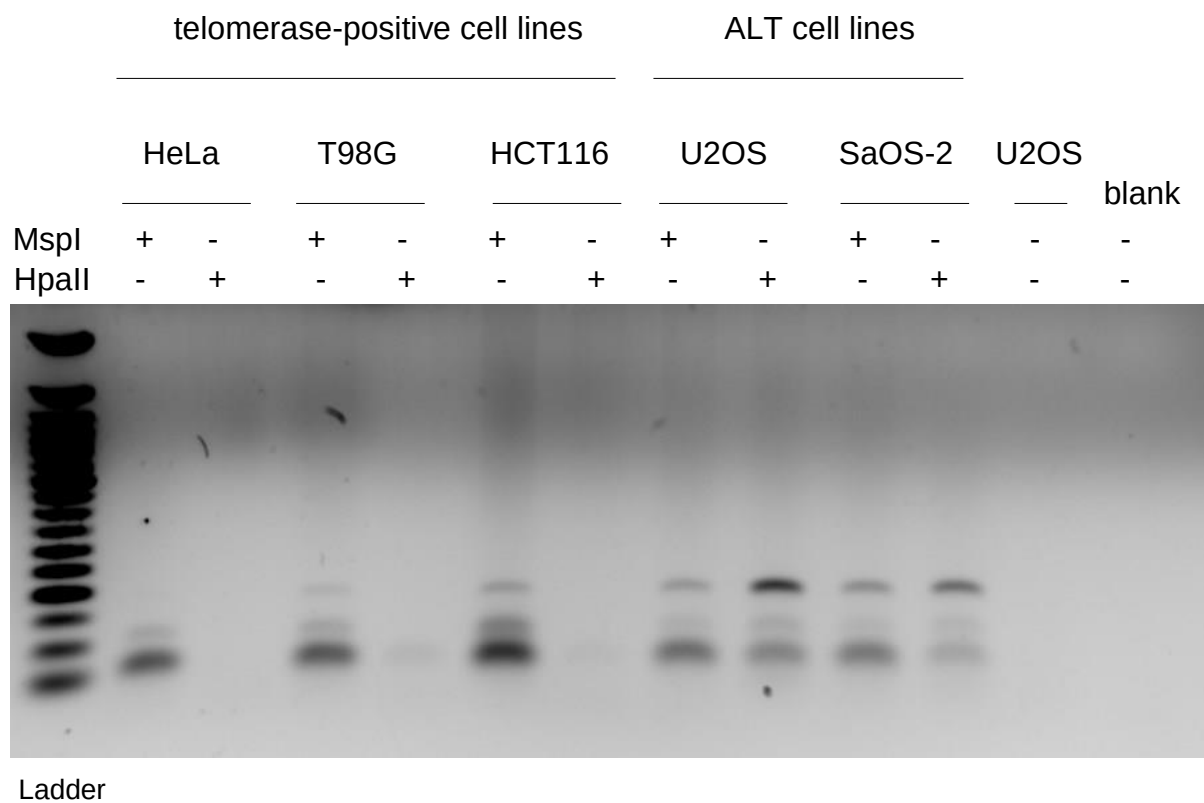

**Figure S1. The level of methylation of the subtelomeric 29-bp repeats is lower in ALT cell lines than in telomerase-positive cell lines.** Methylation of the 29-bp repeats in telomerase-positive and ALT cell lines was analyzed using the method described in Figure 1B: 500 ng of genomic DNA was digested with HpaII (methyl sensitive) or MspI (methyl insensitive), 1/20 of the elongation reaction was amplified by PCR (31 PCR cycles), and PCR products were run on a 1.5% BET-agarose gel. Undigested genomic DNA from U2OS cells and a sample without DNA (blank) were used as negative controls. Ladder is the 50-bp DNA ladder (New England BioLabs).

## Figure S2

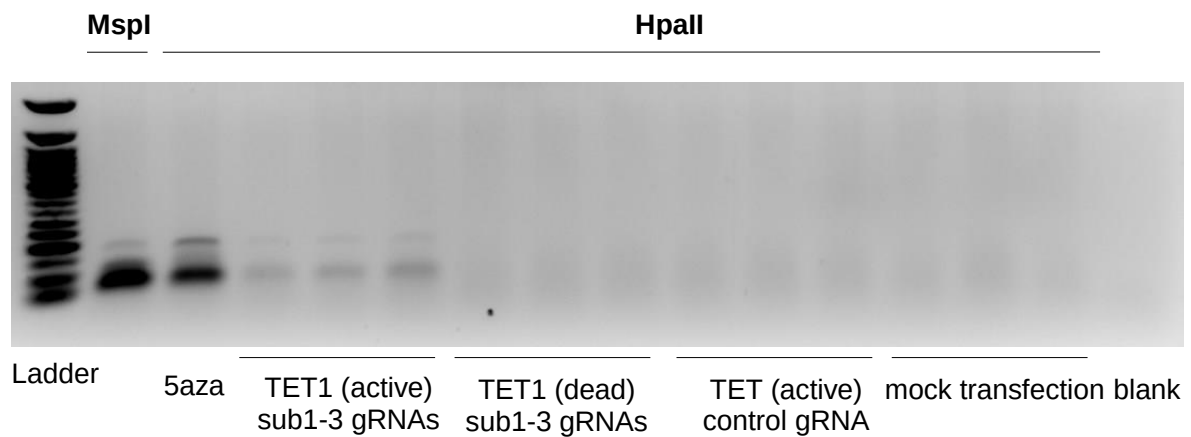

**Figure S2. The demethylation of the 29-bp repeats induced by the CRISPR-dCas9-TET1 system is significantly weaker than the demethylation induced by 5-aza-dC treatment.** Methylation of the 29-bp repeats in HeLa cells 96 hours after mock transfection or transfection with the CRISPR-dCas9-TET1 system and in HeLa cells treated with 5-aza-dC for 72 hours was analyzed using the method described in Figure 1B: 1  $\mu$ g of genomic DNA was digested with HpaII, 1/20 of the elongation reaction was amplified by PCR (30 PCR cycles), and PCR products were run on a 1.5% BET-agarose gel. Each lane corresponds to an independent transfection experiment. Genomic DNA from untreated HeLa cells digested with MspI was used as positive control, and a sample without DNA (blank) was used as negative control. Ladder is the 50-bp DNA ladder (New England BioLabs).

## Figure S3

|                  |    |    |    |    |     |    |    |    |     |     |     |    |
|------------------|----|----|----|----|-----|----|----|----|-----|-----|-----|----|
| NRF1 consensus   | Y  | G  | C  | G  | C   | A  | Y  | G  | C   | G   | C   | R  |
|                  | 80 | 80 | 85 | 90 | 100 | 95 | 75 | 95 | 100 | 100 | 100 | 85 |
| TFB2M            | T  | T  | C  | G  | C   | A  | T  | G  | C   | G   | C   | A  |
| 29-bp repeat (1) | T  | G  | C  | G  | C   | C  | T  | G  | C   | G   | C   | C  |
| 29-bp repeat (2) | T  | G  | C  | G  | C   | C  | G  | G  | C   | G   | C   | G  |

**Figure S3. The NRF1 binding sites located in the 29-bp repeats differ by two nucleotides from the NRF1 consensus binding site.** Sequences of the NRF1 consensus binding site, of the sites located at the *TFB2M* promoter, and of the two sites located in the 29-bp repeats are indicated. Numbers below the consensus represent the percent presence of the indicated nucleotide at that position in 20 functional NRF1 binding sites. Y indicates pyrimidine nucleotide, R indicates purine nucleotide. Nucleotides that differ from the consensus are in red.

Figure S4

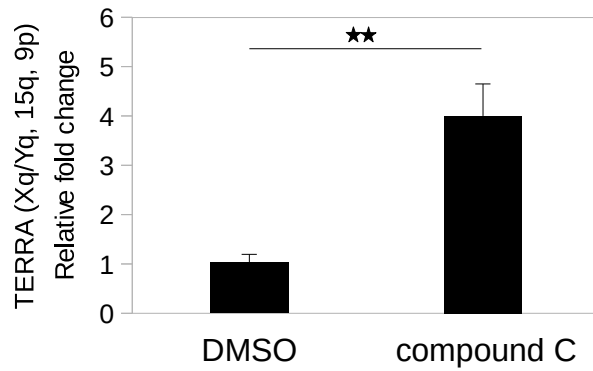

**Figure S4. Compound C induces an increase of TERRA levels in HCT116 cells.** RT-qPCR analysis of TERRA levels (Xq, Yq, 15q, 9p) in HCT116 cells treated with DMSO or compound C (5  $\mu$ M) for 18 hours. TERRA was quantified by RT-qPCR using TR and TF primers; levels were normalized to *GAPDH* mRNA, and all values were compared to DMSO-treated sample. The bars represent the average values from three biological and two technical replicates for each sample. Error bars represent the standard deviations. P values were calculated by paired two-tailed Student's t-test (n=3). \*\*P<0.01.
